# Supplementary material for: The effect of cobalt promoter on the CO methanation reaction over MoS2 catalyst: a density functional study
Source: Royal Society of Chemistry journal article supplement (doi:10.1039/c6ra27422f), 2017-01-01
Supplement: c6ra27422f1.pdf [file c6ra27422f1.pdf]

## 1. Adsorption performance

Adsorption performance of O, OH, CHO, COH, CHOH, CH<sub>2</sub>OH, CH<sub>3</sub>O, CH<sub>2</sub>, CH<sub>3</sub>, and H<sub>2</sub>O species over Co-MoS<sub>2</sub> was summarized in this text. Table 1 listed adsorption energies ( $E_{\text{ads}}$ , in kcal/mol) and the geometry parameters (in Å). Fig. 1 and Fig. 2 showed the adsorption configurations of reactants and intermediates involved.

As can be seen, O atom on T<sub>1</sub> tends to adsorb on Mo site instead of Co site, and OH species favors to bridge on Co-Mo site or on bare Mo site. Similarly, on T<sub>2</sub>, both O atom and OH species prefer to bridge on adjacent Mo-Mo site rather than Co-Mo site. On T<sub>1</sub>, CHO prefers to bridge adsorb by its carbon atom binding with Co site and its oxygen site binding with Mo site, as shown in Fig. 1. In addition, for T<sub>2</sub>, CHO prefer to adsorb either by its carbon atom binding with Mo site and its oxygen site binding with Co site (-48.45 kcal/mol) or by its carbon atom binding with Co site and its oxygen site binding with Mo site (-45.68 kcal/mol). For COH species, the most stable adsorption configuration on T<sub>1</sub> termination was its carbon atom bridging on the adjacent Co-Mo site (-82.68 kcal/mol), yet on T<sub>2</sub> termination COH prefers to either bridge at Co-Mo site with its carbon atom (-90.14 kcal/mol) or bind at the bare Co site with its carbon atom (-90.12 kcal/mol). CHOH species on T<sub>1</sub> and T<sub>2</sub> has analogous adsorption configurations, by its carbon binding with Co site, or bridge the Co-Mo site with its carbon and oxygen atom. Likewise, CH<sub>2</sub>OH species on T<sub>1</sub> and T<sub>2</sub> has similar adsorption configurations by bridging the Co-Mo site with its carbon and oxygen atom. CH<sub>3</sub>O was discovered to adsorb at the bare Mo site or bare Co site with its oxygen center on T<sub>1</sub> termination, and bridge at the Co-Mo site with its oxygen atom on T<sub>2</sub> termination. On the T<sub>1</sub> termination, CH<sub>2</sub> favors to bridge the Co-Mo site (-98.40 kcal/mol) or adsorb at unsaturated Co site (-93.55 kcal/mol), while CH<sub>3</sub> species

tends to interact with unsaturated Co site (-50.62 kcal/mol) or unsaturated Mo site (-48.94 kcal/mol). On the T<sub>2</sub> termination, adjoining Mo-S site (-109.92 kcal/mol) and Co-Mo site (-101.84 kcal/mol) was both active for CH<sub>2</sub>, while S site (-43.82 kcal/mol) was the most active adsorption site for CH<sub>3</sub>, as can be seen in Fig. 2. H<sub>2</sub>O species on Mo edge preferred to adsorb on the Co site, while on S edge, Mo site was prior to Co site for the adsorption of H<sub>2</sub>O species.

**Table 1** Adsorption energies ( $E_{\text{ads}}$ , in kcal/mol) and the geometry parameters (in Å) of reactants, intermediates, and products on T<sub>1</sub> and T<sub>2</sub> terminations

|        | T <sub>1</sub>   |                                                    | T <sub>2</sub>   |                                                        |
|--------|------------------|----------------------------------------------------|------------------|--------------------------------------------------------|
|        | $E_{\text{ads}}$ | $d_{\text{C-O/Co-C/Co-O/Co-H/Mo-C/Mo-O/Mo-H/S-H}}$ | $E_{\text{ads}}$ | $d_{\text{C-O/Co-C/Co-O/Co-H/Mo-C/Mo-O/Mo-H/S-H/S-C}}$ |
| H(a)   | -55.58           | -/-/1.48/-/-/-                                     | -59.27           | -/-/-/-/1.93,1.81/-/-                                  |
| H(b)   | -53.04           | -/-/-/-/1.71/-                                     | -52.35           | -/-/1.78/-/1.77/-/-                                    |
| H(c)   | -44.51           | -/-/-/-/1.36                                       | -50.50           | -/-/-/-/1.36/-                                         |
| O(a)   | -146.66          | -/-/-/-/1.75/-/-                                   | -157.04          | -/-/-/-/1.84,2.15/-/-/-                                |
| O(b)   | -119.68          | -/1.68/-/-/-/-                                     | -141.36          | -/1.97/-/-/1.83/-/-/-                                  |
| OH(a)  | -77.94           | -/2.10/-/2.20/-/-                                  | -80.71           | -/-/-/-/2.24,2.14/-/-/-                                |
| OH(b)  | -76.79           | -/-/-/-/2.02/-/-                                   | -72.87           | -/1.99/-/-/2.20/-/-/-                                  |
| CO(a)  | -45.43           | 1.15/1.77/-/-/-/-                                  | -24.91           | 1.16/1.78/-/-/-/-/-                                    |
| CO(b)  | -26.98           | 1.16/-/-/2.06/-/-/-                                | -24.67           | 1.16/-/-/2.05/-/-/-/-                                  |
| CHO(a) | -71.79           | 1.27/1.84/-/-/2.21/-/-                             | -48.45           | 1.25/1.87/-/-/2.28/-/-/-                               |
| CHO(b) | -58.98           | 1.25/-/1.94/-/2.25/-/-/-                           | -45.68           | 1.25/-/1.99/-/2.17/-/-/-/-                             |

---

|                       |        |                          |         |                               |
|-----------------------|--------|--------------------------|---------|-------------------------------|
| COH(a)                | -82.68 | 1.32/1.90/-/-/2.22/-/-/- | -90.14  | 1.35/1.94/-/-/2.12/-/-/-/1.83 |
| COH(b)                | -66.20 | 1.51/1.94/-/-/2.03/-/-   | -90.12  | 1.34/1.84/-/-/-/-/-/-         |
| CH <sub>2</sub> O(a)  | -30.87 | 1.38/2.02/-/-/1.98/-/-   | -12.62  | 1.34/-/-/-/2.21/2.03/-/-/-    |
| CH <sub>2</sub> O(a)  | -20.37 | 1.29/-/1.92/-/2.46/-/-/- | -11.47  | 1.23/-/-/-/2.39/-/-/-         |
| CHOH(a)               | -79.94 | 1.31/1.81/-/-/-/-/-/-    | -72.97  | 1.44/-/2.09/-/2.20/-/-/-/1.81 |
| CHOH(a)               | -79.04 | 1.39/1.97/-/-/2.32/-/-   | -71.53  | 1.44/1.95/-/-/2.31/-/-/1.82   |
| CH <sub>3</sub> O(a)  | -66.02 | 1.34/-/-/-/2.17/-/-      | -61.77  | 1.42/-2.00/-/-/2.10/-/-/-     |
| CH <sub>3</sub> O(b)  | -62.38 | 1.34/-/1.94/-/-/-/-/-    |         |                               |
| CH <sub>2</sub> OH(a) | -64.49 | 1.51/1.94/-/-/2.18/-/-   | -41.10  | 1.47/-/2.04/-/2.26/-/-/-/-    |
| CH <sub>2</sub> OH(b) | -61.51 | 1.49/-/2.00/-/2.24/-/-/- | -40.27  | 1.48/2.00/-/-/2.30/-/-/-      |
| CH <sub>3</sub> OH(a) | -27.99 | 1.46/-/2.04/-/-/-/-/-    | -13.20  | 1.45/-/-/-/2.45/-/-/-         |
| CH <sub>3</sub> OH(b) | -22.28 | 1.45/2.57/-/-/2.31/-/-   | -12.15  | 1.46/-/2.22/-/-/2.58/-/-/-    |
| CH <sub>2</sub> (a)   | -98.40 | -/2.02/-/-/2.21/-/-/-    | -109.92 | -/-/-/2.21/-/-/-/1.77         |
| CH <sub>2</sub> (b)   | -93.55 | -/1.77/-/-/-/-/-/-       | -101.84 | -/1.98/-/-/2.16/-/-/-/-       |
| CH <sub>3</sub> (a)   | -50.62 | -/1.99/-/-/-/-/-/-       | -43.82  | -/-/-/-/-/-/1.84              |
| CH <sub>3</sub> (b)   | -48.94 | -/-/-/2.26/-/-/-/-       | -37.74  | -/-/-/2.25/-/-/-/-            |
| H <sub>2</sub> O(a)   | -25.50 | -/-/2.06/-/-/-/-/-       | -14.50  | -/-/-/-/2.45/-/-/-            |
| H <sub>2</sub> O(b)   | -24.22 | -/-/2.06/-/-/-/-/-       | -12.57  | -/-/-/-/2.47/-/-/-            |

---

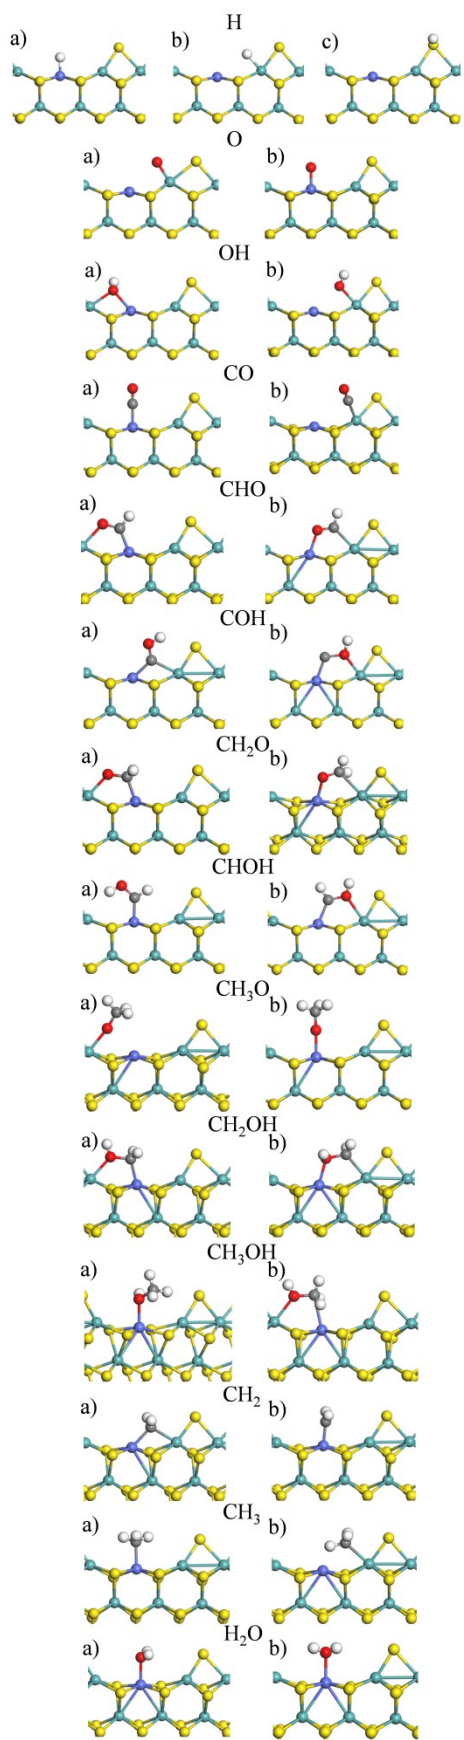

**Fig. 1.** Adsorption configurations of reactants and intermediates in most stable states on T<sub>1</sub>

termination

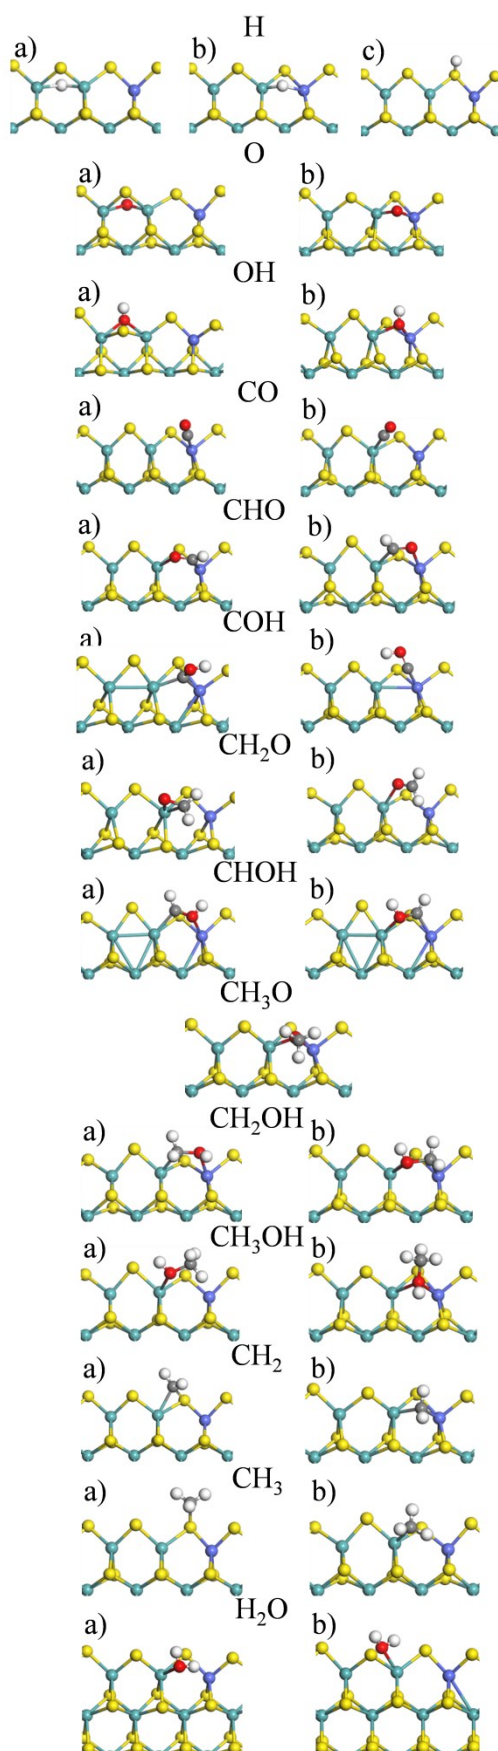

**Fig. 2.** Adsorption configurations of reactants and intermediates in most stable states on T<sub>2</sub> termination

Structurally, for all adsorbed C1 species involved in CO methanation reaction on T<sub>1</sub> and T<sub>2</sub> terminations, the C-Mo distance ranges from 2.06 to 2.46 Å, and the C-Co bonds were from 1.77 to 2.02 Å in length, in which strong interactions between the catalysts and the adsorbed atoms lead to relative adsorbed intermediates elongation.

## 2. Discussions on dispersion interactions

The impact of dispersion interactions on calculation results was tested. Results of adsorption performance with or without dispersion show little difference. However, dispersion interactions were found to affect transition state configurations and reaction barriers to different degrees, which couldn't be ignored. The first elementary reaction step  $CO + H \rightarrow CHO$  and the second one  $CHO + H \rightarrow CH_2O$  on both edges of Co-MoS<sub>2</sub> catalysts were taken as examples, the values of reaction barrier ( $E_a$ ) and reaction energy ( $E_{sep}$ ) were listed below.

**Table 2** Reaction barriers and reaction energies with or without dispersion interactions of reaction step  $CO + H \rightarrow CHO$  on both edges of Co-MoS<sub>2</sub> catalystst, the values were given in kcal/mol.

|           |                        | <i>Mo edge of Co-MoS<sub>2</sub></i> | <i>S edge of Co-MoS<sub>2</sub></i> |
|-----------|------------------------|--------------------------------------|-------------------------------------|
| $E_a$     | <i>With dispersion</i> | 25.08                                | 16.99                               |
|           | <i>Without</i>         | 25.22                                | 30.96                               |
| $E_{sep}$ | <i>With dispersion</i> | 2.60                                 | 5.94                                |
|           | <i>Without</i>         | 2.76                                 | 6.96                                |

**Table 3** Reaction barriers and reaction energies with or without dispersion interactions of reaction step of  $CHO + H \rightarrow CH_2O$  on both edges of Co-MoS<sub>2</sub> catalystst, the values were given in kcal/mol.

|           |                        | <i>Mo edge of Co-MoS<sub>2</sub></i> | <i>S edge of Co-MoS<sub>2</sub></i> |
|-----------|------------------------|--------------------------------------|-------------------------------------|
| $E_a$     | <i>With dispersion</i> | 12.77                                | 14.83                               |
|           | <i>Without</i>         | 10.55                                | 18.58                               |
| $E_{sep}$ | <i>With dispersion</i> | -6.58                                | 6.91                                |
|           | <i>Without</i>         | -6.48                                | 6.88                                |

As can be seen from table 2 and table 3, although dispersion interactions influenced the reaction energies slightly, this factor affected the reaction barriers obviously and it should be taken in to consideration.

### 3. Configurations of species

The configurations of reactants, transition states and products along feasible pathways on four edges were given in Fig. 3-8 below, with detailed information including bond lengths (in Å) and angles (in °). Fig. 3 and Fig. 4 shown the configurations involved in the optimal pathway on Mo edge and S edge of pure MoS<sub>2</sub> catalysts, respectively. Configurations involved in all feasible pathways on Mo edge of Co-MoS<sub>2</sub> was given in Fig. 5 and Fig. 6, while Fig. 7 and Fig. 8 showed the configurations on S edge of Co-MoS<sub>2</sub>.

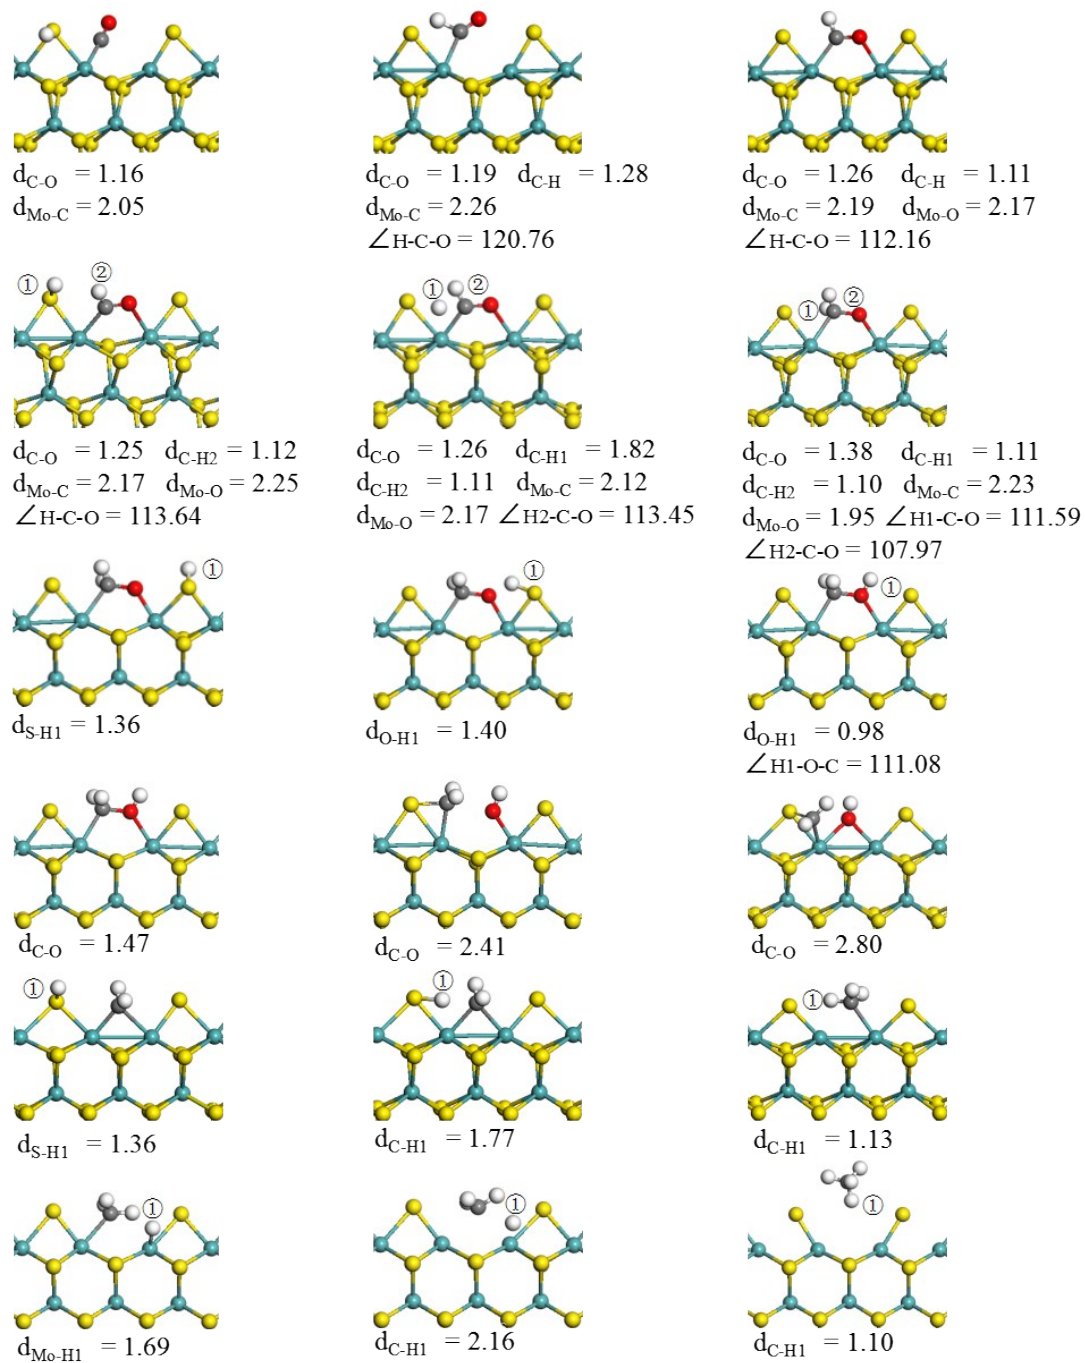

**Fig. 3.** Configuration of reactants, transition states, and products in the optimal pathways on MoS<sub>2</sub> catalysts (bond distances in Å and angles in °)



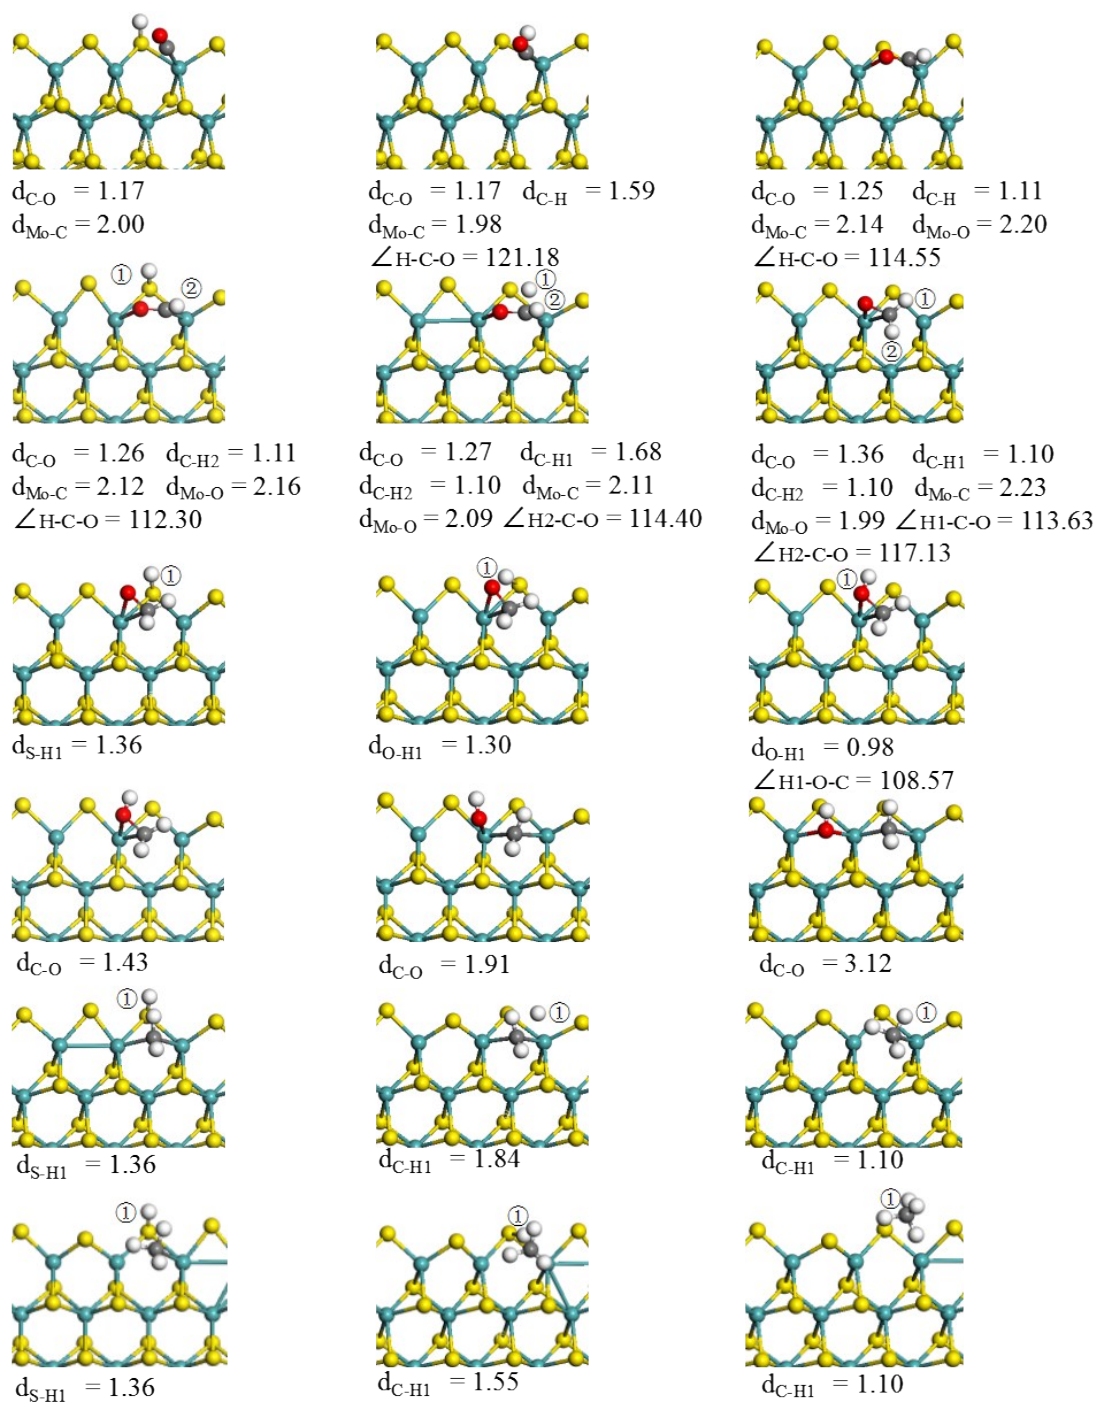

**Fig. 4.** Configuration of reactants, transition states, and products in the optimal pathways on S termination of MoS<sub>2</sub> catalysts (bond distances in Å and angles in °)

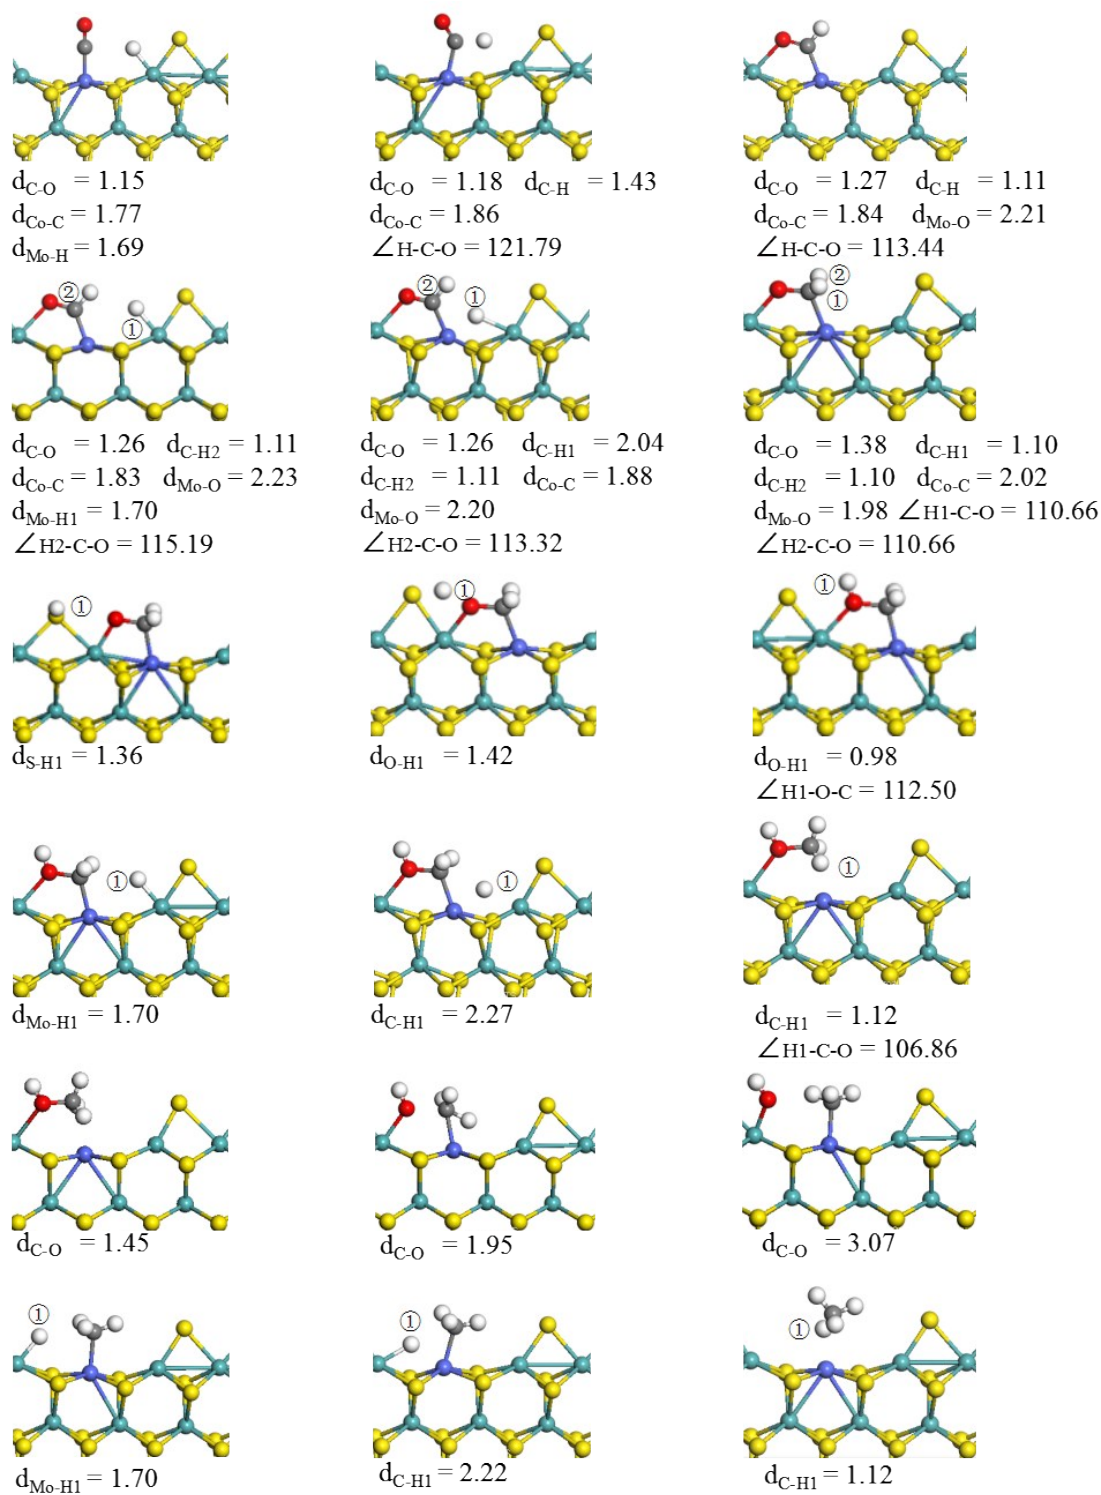

**Fig. 5.** Configuration of reactants, transition states, and products in the optimal pathways on Mo termination of Co-MoS<sub>2</sub> catalysts (bond distances in Å and angles in °)

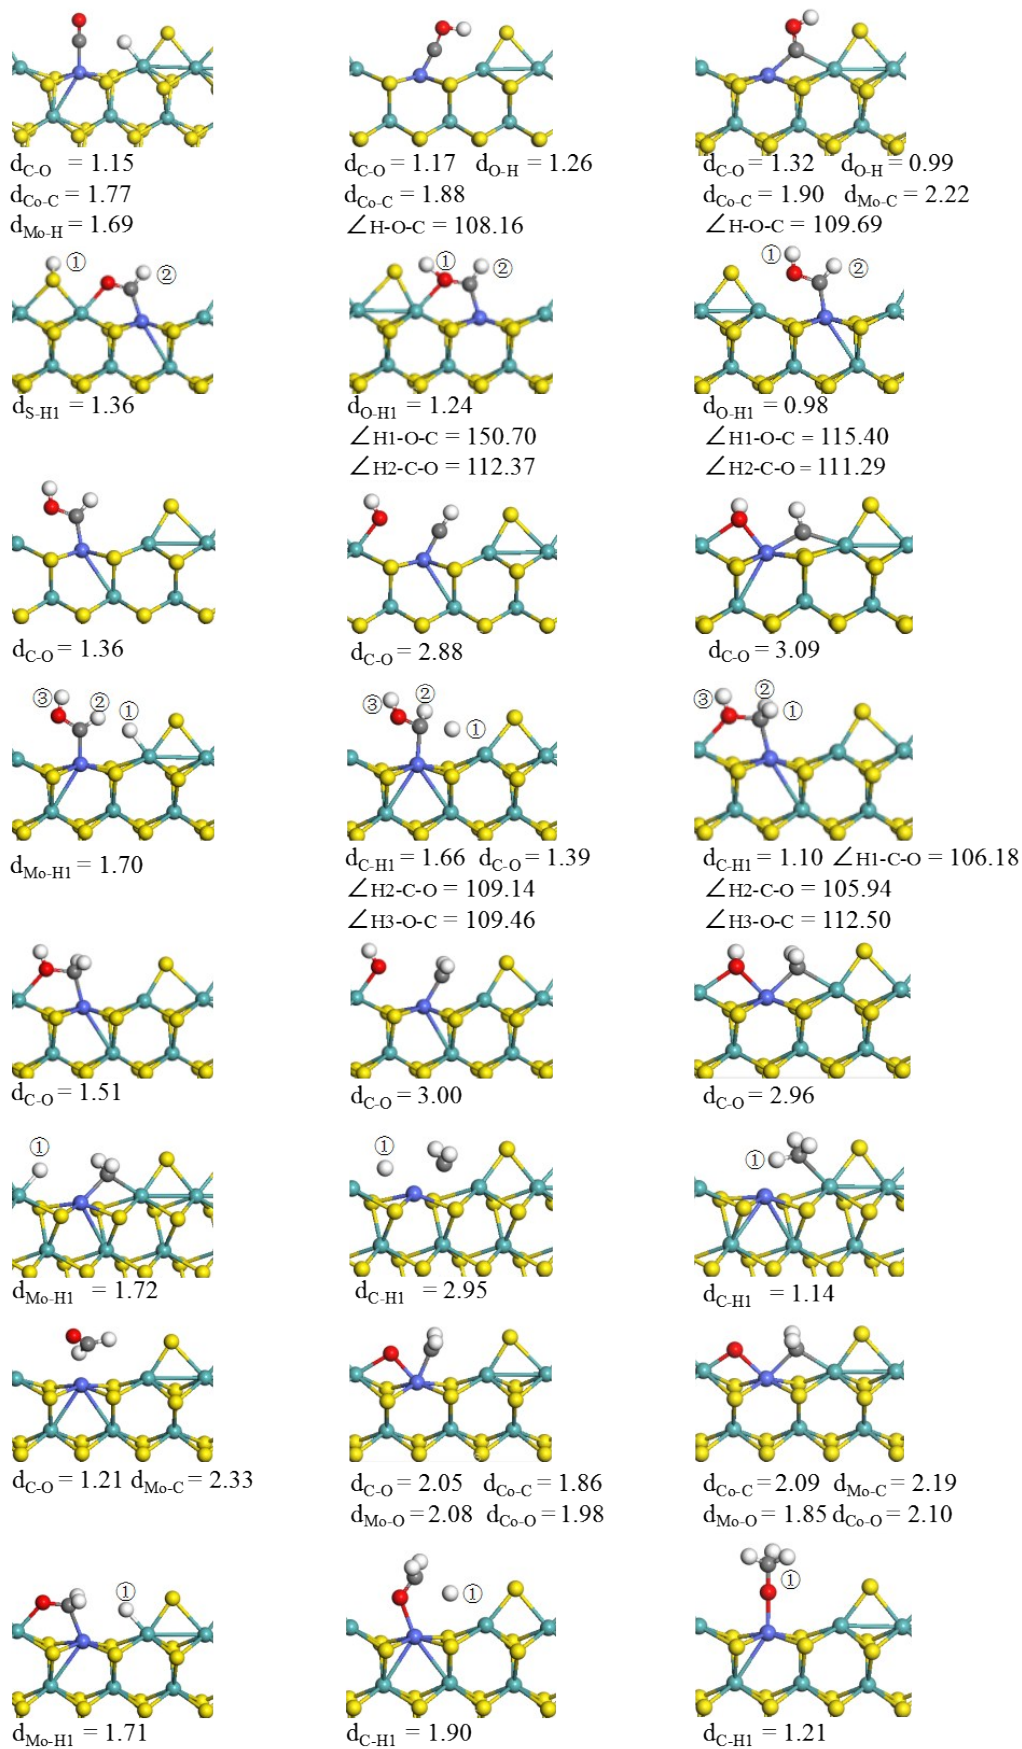

**Fig. 6.** Configuration in the other feasible pathways on Mo edge of Co-MoS<sub>2</sub> catalysts (distances in Å and angles in °)



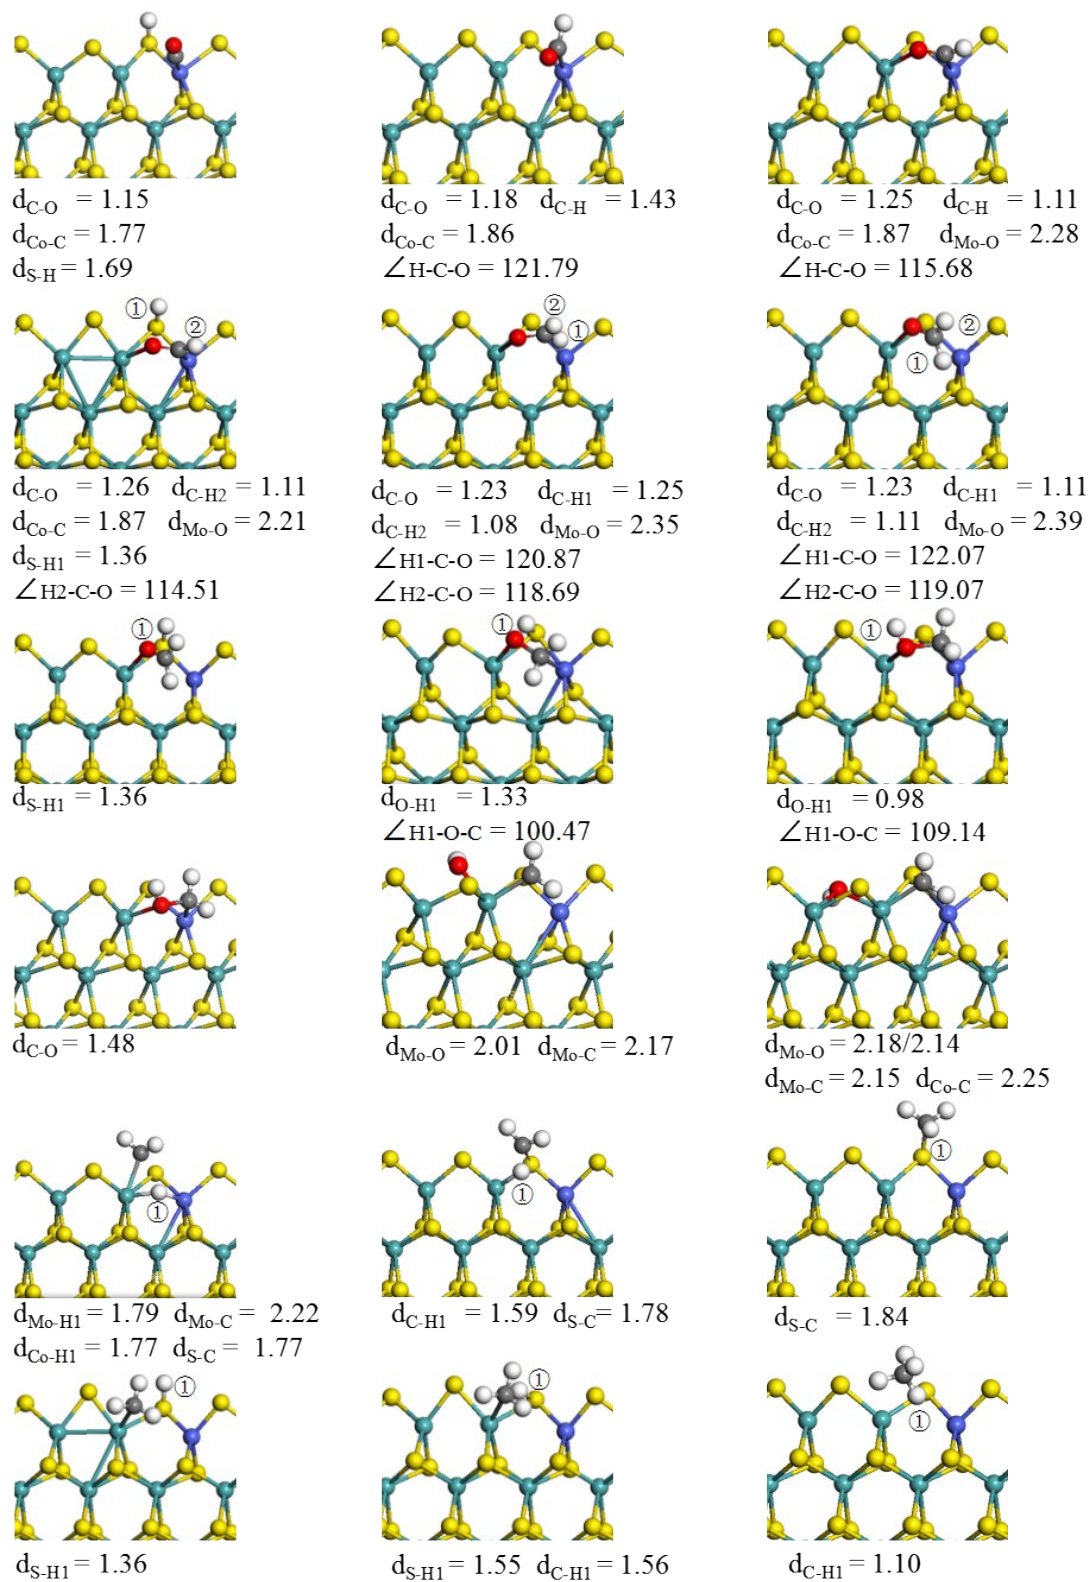

**Fig. 7.** Configuration of reactants, transition states, and products in the optimal pathways on S termination of Co-MoS<sub>2</sub> catalysts (bond distances in Å and angles in °)

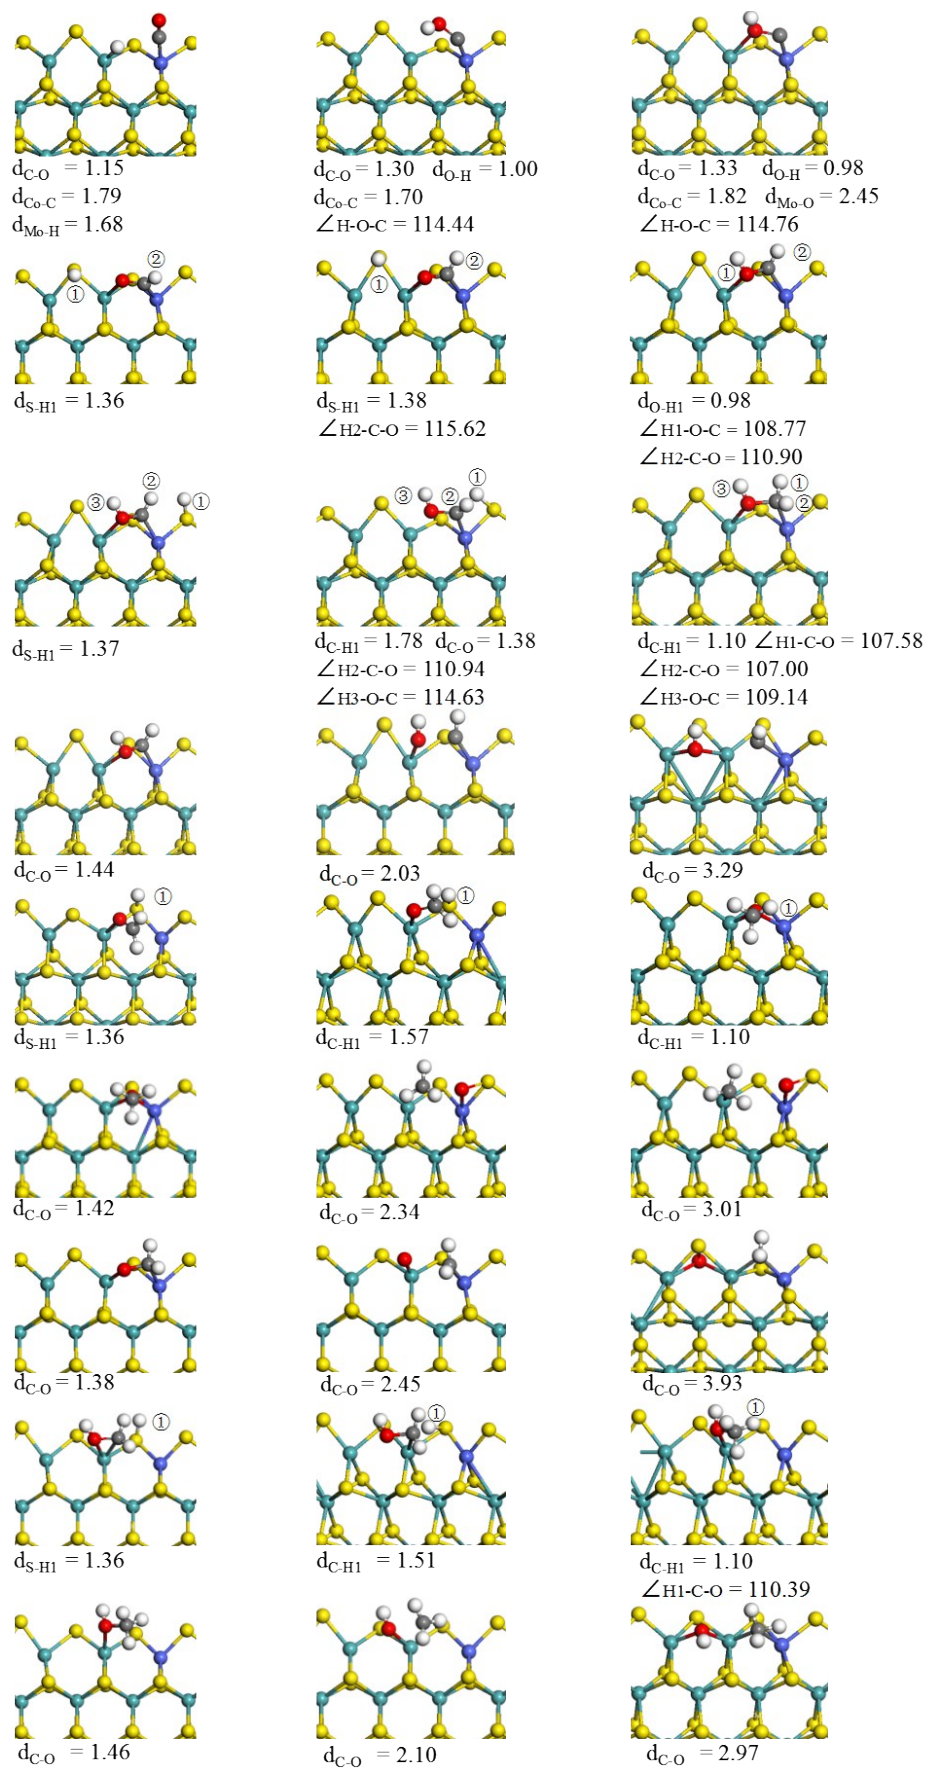

**Fig. 8.** Configuration in the other feasible pathways on S termination of Co-MoS<sub>2</sub> catalysts (bond distances in Å and angles in °)
